# Supplementary material
Source: PubMed Central journal article supplement (PMC6527484)
Supplement: NIHMS1024766-supplement-1.pdf [file NIHMS1024766-supplement-1.pdf]

**Supplementary Text:**

In US&I subgroup of the 2010 survey, majority of participations were male (97.04%), had low education (71.70%), and had history of prison (81.13%). HIV prevalence ranged from 9.42% in only unsafe sex subgroup to 19.80% in only unsafe injection subgroup.

In US&I subgroup of the 2013 survey, majority of participations also were male (98.85%), had low education (70.77%), and had history of prison (80.69%). Also, the HIV prevalence ranged from 5.26% in only unsafe sex subgroup to 21.82% in only unsafe injection subgroup.

Participants in both the 2010 and 2013 survey, were more male, less married, lower educated in all subgroups. Compare with 2010, using only opioids in past month was reported lower in 2013 of participants in all subgroup, while we observed higher using of both opioids and stimulants in 2013 in all subgroups. Also, the highest prevalence of STD symptoms (18.04%) was reported in US&I subgroup compare with 7.26% in 2010. Majority of participants were from west and north geographic areas of Iran in both surveys.

**Table S1. Comparing the characteristics of the UI&S in the people who inject drugs in different subgroups, national survey, Iran, 2013 and 2010, people who injected in past month.**

|                                                                 | The PWID national survey 2013 |                       |                 |                               | The PWID national survey 2010 |                       |                 |                               |
|-----------------------------------------------------------------|-------------------------------|-----------------------|-----------------|-------------------------------|-------------------------------|-----------------------|-----------------|-------------------------------|
|                                                                 | Safe injection & sex (SI&S)   | Only unsafe injection | Only unsafe sex | Unsafe injection & sex (UI&S) | Safe injection & sex (SI&S)   | Only unsafe injection | Only unsafe sex | Unsafe injection & sex (UI&S) |
|                                                                 | N(%)                          | N(%)                  | N(%)            | N(%)                          | N(%)                          | N(%)                  | N(%)            | N(%)                          |
| Male                                                            | 280 (98.3)                    | 271 (97.1)            | 231 (99.1)      | 257 (98.9)                    | 509 (98.8)                    | 417 (98.6)            | 281 (97.9)      | 361 (97.0)                    |
| Age (<=30 years old)                                            | 52 (18.3)                     | 49 (17.6)             | 62 (26.6)       | 74 (28.5)                     | 191 (37.1)                    | 171 (40.4)            | 124 (43.2)      | 192 (51.6)                    |
| Low education (lower than high-school)                          | 192 (67.6)                    | 202 (72.4)            | 159 (68.2)      | 184 (70.8)                    | 362 (70.4)                    | 309 (73.1)            | 207 (72.4)      | 266 (71.7)                    |
| No source of income                                             | 116 (41.0)                    | 95 (34.6)             | 73 (31.6)       | 67 (26.3)                     | 191 (38.0)                    | 174 (41.7)            | 94 (35.6)       | 148 (40.4)                    |
| Currently married (including temporary marriage, i.e. 'Sigheh') | 16 (5.6)                      | 14 (5.0)              | 80 (34.3)       | 75 (28.9)                     | 73 (14.2)                     | 48 (11.4)             | 159 (55.4)      | 158 (42.5)                    |
| Prison history (ever)                                           | 249 (87.4)                    | 246 (88.2)            | 179 (76.8)      | 209 (80.7)                    | 393 (76.6)                    | 362 (85.8)            | 215 (75.4)      | 301 (81.1)                    |
| Age at first drug use (≤18 years old)                           | 159 (55.8)                    | 150 (53.8)            | 131 (56.2)      | 140 (53.9)                    | 271 (52.6)                    | 234 (55.3)            | 175 (61.0)      | 216 (58.1)                    |
| Drug injection duration (≤10 years)                             | 155 (54.6)                    | 125 (45.0)            | 129 (56.3)      | 153 (6)                       | 354 (70.0)                    | 291 (70.5)            | 210 (73.9)      | 282 (78.1)                    |
| Type of drugs in past month *                                   |                               |                       |                 |                               |                               |                       |                 |                               |
| Only opioids                                                    | 65 (26.1)                     | 49 (19.1)             | 63 (30.0)       | 43 (18.5)                     | 416 (83.9)                    | 323 (77.8)            | 192 (70.1)      | 249 (70.1)                    |
| Only stimulants                                                 | 20 (8.0)                      | 12 (4.7)              | 11 (5.2)        | 20 (8.6)                      | 36 (7.3)                      | 38 (9.2)              | 38 (13.9)       | 41 (11.6)                     |
| Opioids and stimulants                                          | 164 (65.9)                    | 196 (76.3)            | 136 (64.8)      | 170 (73.0)                    | 44 (8.9)                      | 54 (13.0)             | 44 (16.1)       | 65 (18.3)                     |
| Currently on opioids substitute therapy                         | 71 (30.0)                     | 63 (29.6)             | 80 (37.0)       | 92 (39.8)                     | 91 (28.1)                     | 63 (23.0)             | 54 (27.7)       | 42 (17.3)                     |
| STD symptom in past year                                        | 6 (2.2)                       | 17 (6.4)              | 14 (6.1)        | 46 (18.0)                     | 8 (1.6)                       | 10 (2.4)              | 15 (5.2)        | 27 (7.3)                      |
| HIV positive                                                    | 25 (8.9)                      | 60 (21.8)             | 12 (5.3)        | 16 (6.3)                      | 81 (16.8)                     | 79 (19.8)             | 26 (9.4)        | 47 (13.4)                     |
| Geographic areas **                                             |                               |                       |                 |                               |                               |                       |                 |                               |
| North                                                           | 81 (28.4)                     | 79 (28.3)             | 75 (32.2)       | 124 (47.7)                    | 150 (29.1)                    | 99 (23.4)             | 86 (30.0)       | 111 (29.8)                    |
| East                                                            | 72 (25.3)                     | 17 (6.1)              | 76 (32.6)       | 28 (10.8)                     | 68 (13.2)                     | 78 (18.4)             | 74 (25.8)       | 96 (25.8)                     |
| West                                                            | 99 (34.7)                     | 163 (58.4)            | 55 (23.6)       | 87 (33.5)                     | 210 (40.8)                    | 110 (26.0)            | 98 (34.2)       | 80 (21.5)                     |

|       |           |          |           |          |           |            |           |           |
|-------|-----------|----------|-----------|----------|-----------|------------|-----------|-----------|
| South | 33 (11.6) | 20 (7.2) | 27 (11.6) | 21 (8.1) | 87 (16.9) | 136 (32.2) | 29 (10.1) | 85 (22.9) |
|-------|-----------|----------|-----------|----------|-----------|------------|-----------|-----------|

\* Type of Drug (both injected or non-injected): Stimulant= Shishe, Hashish/grass/Cannabis, Marijuana, Ecstasy, Cocaine, and methamphetamine/crystal  
 opioids=Opium, Opium sap, Opium syrup, Heroin, **Norchizak**, Tamchizak, Buprenorphine, Methadone, and Crack

\*\* Geographic areas: East=Kerman, Zahedan, and Mashhad, North=Tehran, and Sari, West=Kermanshah, Tabriz, and Lorestan, South=Shiraz, Ahvaz

**Table S2. The prevalence of UI&S in overall and subgroups of people who inject drugs in past month, Iran, 2010**

|                                                                 |                        | <b>Safe injection &amp; sex (SI&amp;S)</b> | <b>Only unsafe injection</b> | <b>Only unsafe sex</b> | <b>Unsafe injection &amp; sex (UI&amp;S)</b> |
|-----------------------------------------------------------------|------------------------|--------------------------------------------|------------------------------|------------------------|----------------------------------------------|
|                                                                 |                        | <b>Percent (CI95%)</b>                     | <b>Percent (CI95%)</b>       | <b>Percent (CI95%)</b> | <b>Percent (CI95%)</b>                       |
| Total                                                           |                        | 32.3(25.2, 40.2)                           | 26.5(22.3, 31.1)             | 18.0(14.8, 21.6)       | 23.3(19.0, 28.2)                             |
| Gender                                                          | Male                   | 32.5(25.4,40.5)                            | 26.6(22.4,31.3)              | 17.9(14.8,21.5)        | 23.0(18.7,28.0)                              |
|                                                                 | Female                 | 20.7(9.7,38.8)                             | 20.7(8.0,43.8)               | 20.7(8.0,44.0)         | 37.9(14.8,68.3)                              |
| Age                                                             | >30 years old          | 35.3(28.2,43.0)                            | 27.4(22.8,32.5)              | 17.7(14.4,21.7)        | 19.6(15.8,24.1)                              |
| Age (<=30)                                                      | ≤30 years old          | 28.2(21.1,36.5)                            | 25.2(21.0,30.0)              | 18.3(15.1,21.9)        | 28.3(23.4,33.9)                              |
| Education                                                       | High school and higher | 33.8(24.9,44.0)                            | 25.3(21.0,30.2)              | 17.6(14.7,20.9)        | 23.3(18.4,29.1)                              |
|                                                                 | Guidance and lower     | 31.6(24.9,39.3)                            | 27.0(22.2,32.5)              | 18.1(14.5,22.4)        | 23.3(18.9,28.2)                              |
| Any income                                                      | Yes                    | 31.5(22.1,42.6)                            | 28.7(22.0,36.4)              | 15.5(12.0,19.7)        | 24.4(19.4,30.1)                              |
|                                                                 | No                     | 33.1(26.2,40.8)                            | 25.8(21.5,30.5)              | 18.0(14.8,21.7)        | 23.1(18.2,28.9)                              |
| Currently married (including temporary marriage, i.e. 'Sigheh') | Yes                    | 16.7(11.5,23.6)                            | 11.0(6.1,18.8)               | 36.3(28.4,45.1)        | 36.1(29.6,43.1)                              |
|                                                                 | No                     | 38.1(30.2,46.8)                            | 32.4(27.7,37.4)              | 11.0(9.2,13.3)         | 18.5(14.7,23.0)                              |
| Prison history (ever)                                           | Yes                    | 30.9(24.5,38.2)                            | 28.5(24.6,33.3)              | 16.9(13.6,20.9)        | 23.7(19.3,28.7)                              |
|                                                                 | No                     | 37.5(25.6,51.1)                            | 18.8(13.4,25.6)              | 21.9(16.9,27.8)        | 21.9(16.5,28.5)                              |
| Injection in prison (ever)                                      | Yes                    | 26.9(20.9,33.9)                            | 29.6(21.7,38.9)              | 19.3(13.8,26.3)        | 24.3(19.9,29.2)                              |
|                                                                 | No                     | 32.3(24.8,40.9)                            | 28.1(23.9,32.7)              | 16.3(12.8,20.4)        | 23.3(18.4,29.0)                              |
| Age at first drug use                                           | >18 years              | 34.8(27.6,42.8)                            | 27.0(23.3,31.0)              | 16.0(13.6,18.7)        | 22.3(16.7,29.1)                              |
|                                                                 | ≤18 years              | 30.3(23.1,38.5)                            | 26.1(20.3,32.9)              | 19.5(15.4,24.4)        | 24.1(20.3,28.4)                              |
| Drug injection duration                                         | >10 years              | 35.6(27.5,44.6)                            | 28.6(22.2,36.0)              | 17.3(12.9,22.8)        | 18.5(13.9,24.2)                              |
|                                                                 | ≤10 years              | 31.1(24.1,39.1)                            | 25.6(21.6,30.0)              | 18.5(15.5,21.9)        | 24.8(20.5,29.7)                              |
| Type of drugs injected in past month *                          | Only opioids           | 35.3[26.9,44.6]                            | 27.4[22.5,32.9]              | 16.3[13.0,20.1]        | 21.1[16.3,26.9]                              |
|                                                                 | Only stimulant         | 23.5[16.2,32.9]                            | 24.8[16.1,36.4]              | 24.8[14.8,38.6]        | 26.8[19.7,35.4]                              |
|                                                                 | Opioids and Stimulant  | 21.3[14.8,29.6]                            | 26.1[19.8,33.5]              | 21.3[16.5,26.9]        | 31.4[25.4,38.2]                              |
| Currently on opioids substitute                                 | Yes                    | 36.4(29.6,43.9)                            | 25.2(19.5,31.9)              | 21.6(17.6,26.2)        | 16.8(12.4,22.4)                              |

|                          |     |                 |                 |                 |                 |
|--------------------------|-----|-----------------|-----------------|-----------------|-----------------|
| therapy                  | No  | 29.6(24.1,35.9) | 26.8(22.2,32.1) | 17.9(13.8,23.1) | 25.6(21.6,30.0) |
| STD symptom in past year | Yes | 13.3(7.3,23.0)  | 16.7(8.9,29.0)  | 25.0(14.3,40.1) | 45.0(33.7,56.9) |
|                          | No  | 33.0(25.8,41.1) | 26.7(22.5,31.4) | 17.8(14.6,21.4) | 22.5(18.3,27.5) |

---

\* Type of Drug: Stimulant= Shishe, Hashish/grass/Cannabis, Marijuana, Ecstasy, Cocaine, and methamphetamine/crystal  
opiods=Opium, Opium sap, Opium syrup, Heroin, Norchizak, Tamchizak, Buprenorphine, Methadone, and Krack

**Table S3. The prevalence of unsafe injection and sex by geographic areas and HIV status of people who inject drugs in the past month, Iran, 2010**

|                                       |          | <b>Safe injection &amp; sex (SI&amp;S)</b> | <b>Only unsafe injection</b> | <b>Only unsafe sex</b> | <b>Unsafe injection &amp; sex (UI&amp;S)</b> |
|---------------------------------------|----------|--------------------------------------------|------------------------------|------------------------|----------------------------------------------|
|                                       |          | Percent (CI95%)                            | Percent (CI95%)              | Percent (CI95%)        | Percent (CI95%)                              |
| Geographic areas**                    | North    | 33.6(22.4,47.1)                            | 22.2(18.1,26.9)              | 19.3(11.9,29.7)        | 24.9(16.0,36.5)                              |
|                                       | East     | 21.5(15.8,28.6)                            | 24.7(18.7,31.8)              | 23.4(18.1,29.7)        | 30.4(22.6,39.4)                              |
|                                       | West     | 42.2(29.4,56.1)                            | 22.1(15.4,30.6)              | 19.7(14.8,25.6)        | 16.1(11.3,22.3)                              |
|                                       | South    | 25.8(18.6,34.6)                            | 40.4(30.5,51.1)              | 8.6(6.4,11.5)          | 25.2(20.9,30.1)                              |
| HIV test result                       | Positive | 34.8(26.7,43.8)                            | 33.9(25.0,44.1)              | 11.2(7.0,17.4)         | 20.2(14.2,27.9)                              |
|                                       | Negative | 31.5(23.9,40.7)                            | 25.1(21.1,29.6)              | 19.6(16.2,23.6)        | 23.8(19.0,29.4)                              |
| HIV positive by four geographic areas | North    | 28.3(17.3,42.7)                            | 35.9(23.1,51.0)              | 15.1(10.0,22.2)        | 20.8(15.2,27.7)                              |
|                                       | East     | 21.1(6.3,51.5)                             | 21.1(8.1,44.8)               | 21.1(10.6,37.5)        | 36.8(11.2,73.0)                              |
|                                       | West     | 47.6(34.6,60.8)                            | 24.4(13.9,39.2)              | 15.9(9.2,26.0)         | 12.2(7.5,19.2)                               |
|                                       | South    | 29.1(22.0,37.5)                            | 45.6(32.6,59.1)              | 1.3(0.3,5.7)           | 24.1(17.3,32.5)                              |
| HIV negative by four geographic areas | North    | 34.3(21.3,50.2)                            | 20.7(16.3,25.9)              | 19.9(11.5,32.2)        | 25.1(14.7,39.4)                              |
|                                       | East     | 20.9(14.5,29.1)                            | 24.9(18.4,32.9)              | 24.5(18.4,31.9)        | 29.7(22.1,38.5)                              |
|                                       | West     | 40.7(26.5,56.7)                            | 20.4(13.0,30.5)              | 22.0(16.5,28.7)        | 16.9(11.8,23.7)                              |
|                                       | South    | 25.0(17.2,34.8)                            | 38.7(29.5,48.7)              | 10.6(8.6,13.0)         | 25.8(20.9,31.3)                              |

\*\* Geographic area: East=Kerman, Zahedan, and Mashhad, North=Tehran, and Sari, West=Kermanshah, Tabriz, and Lorestan, South=Shiraz, Ahvaz
